# Supplementary material for: How effective is the combination of ethacridine lactate and Foley catheter balloon dilation for second-trimester pregnancy termination after previous caesarean delivery? a retrospective, case-control study
Source: Research Square preprint supplement (doi:10.21203/rs.3.rs-7148939/v1), 2025-10-08
Supplement: Supplementary file 1 [file 81ff821555b65fc9d2a672c7.pdf]

**Acknowledgments**

We thank ping feng for her help on information collection.

**Funding**

None.

**Availability of data and materials**

Not applicable

**Authors' contributions**

The manuscript has been read and approved by all authors and all authors contributed to the manuscript. CSF and CFS conceived and designed the study. CSF undertook collection, cleaning, analysis and interpretation of the data and wrote the earlier manuscript drafts. CSF revised subsequent manuscript drafts, reviewed records, and prepared tables and figures. CSF supervised all aspects of the study.

**Ethics approval and consent to participate**

All patients signed informed consents, and the study design and protocol were reviewed and approved by the Institutional Review Board of Changzhou Women and Children Health Hospital affiliated to Nanjing Medical University prior to the initiation of the study in March 04, 2025.

**Consent for publication**

Not applicable.

**Competing interests**

The authors declare that they have no financial or nonfinancial conflicts of interest related to the subject matter or materials discussed in the manuscript.
